# Supplementary material for: Cellulose nanofiber-reinforced solid polymer electrolytes with high ionic conductivity for lithium batteries
Source: Royal Society of Chemistry journal article supplement (doi:10.1039/d3ta00380a), 2023-01-01
Supplement: d3ta00380a1.pdf [file d3ta00380a1.pdf]

# Cellulose nanofiber-reinforced solid polymer electrolytes with high ionic conductivity for lithium batteries

## – Supporting Information –

Cristina Prado Martínez,<sup>†</sup> Preston Sutton,<sup>†,‡</sup> Isabella Mombrini,<sup>†,¶</sup> Aristotelis  
Kamtsikakis,<sup>†</sup> Worarin Meesorn,<sup>†</sup> Christoph Weder,<sup>†</sup> Ullrich Steiner,<sup>†</sup> and Ilja  
Gunkel<sup>\*,†</sup>

<sup>†</sup>*Adolphe Merkle Institute, University of Fribourg, Fribourg, 1700, Switzerland*

<sup>‡</sup>*ARC Centre of Excellence for Electromaterials Science and Institute for Frontier  
Materials, Deakin University, Melbourne, 3125 Australia*

<sup>¶</sup>*Electrochemical Innovation Lab, UCL, London, U.K.*

E-mail: [ilja.gunkel@unifr.ch](mailto:ilja.gunkel@unifr.ch)



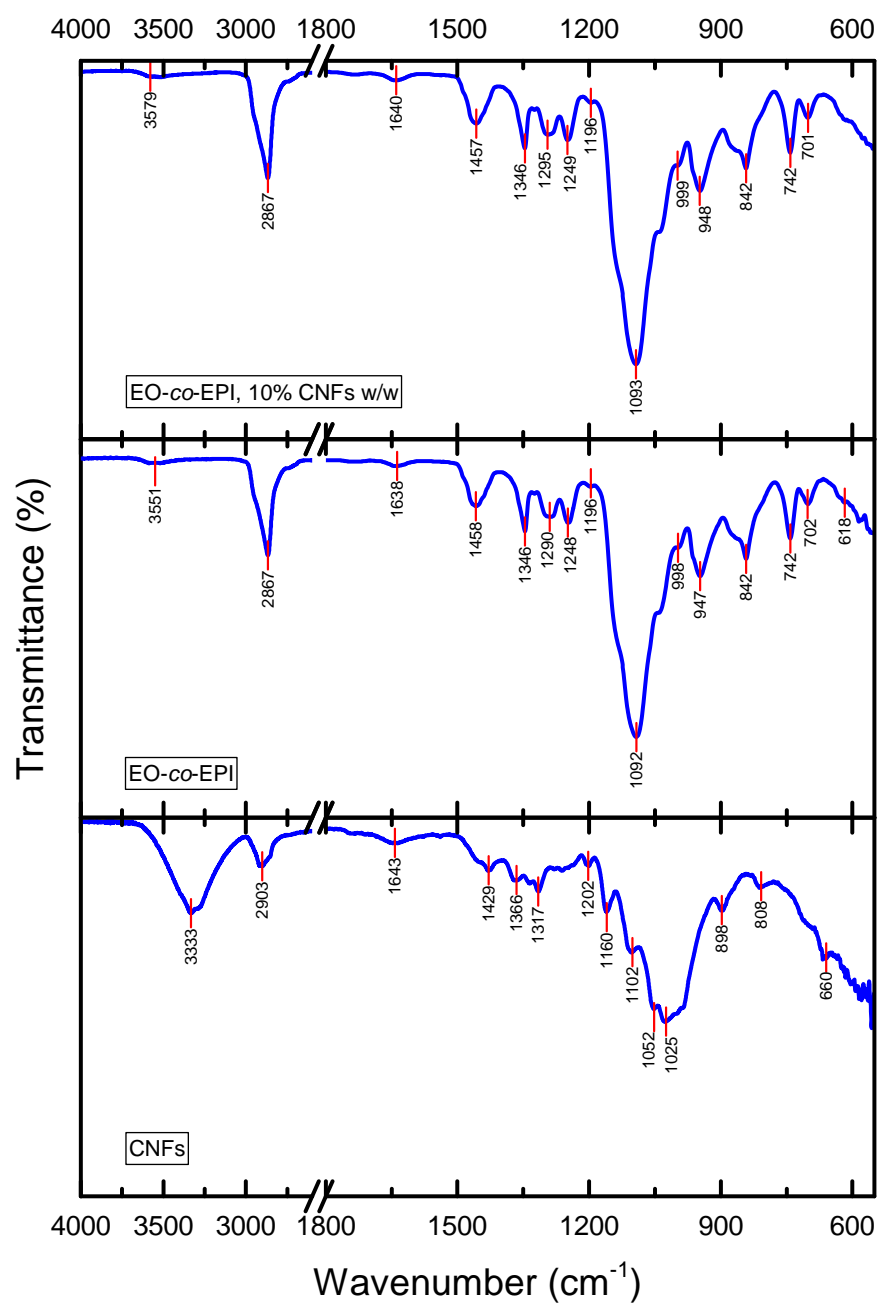

Figure S2: FTIR spectra of an EO-co-EPI composite reinforced with 10 % w/w CNFs and without added LiTFSI (*top*), a neat EO-co-EPI copolymer without added CNFs and without added LiTFSI (*middle*), and a CNF sample (*bottom*).

stretching band from  $1194\text{ cm}^{-1}$  for LiTFSI to  $1188\text{ cm}^{-1}$  for the LiTFSI-doped EO-*co*-EPI indicates interactions between the salt and the polymer matrix. Importantly, a similar shift observed for the C-O-C stretching band from  $1092\text{ cm}^{-1}$  to  $1089\text{ cm}^{-1}$  confirms the well-known complexation of the ether oxygens in EO-based polymers with  $\text{Li}^+$  ions.<sup>1</sup> In addition, a shift is observed for the C-H stretching band at  $2867\text{ cm}^{-1}$  for the neat EO-*co*-EPI to  $2873\text{ cm}^{-1}$  band in the LiTFSI-doped EO-*co*-EPI, which also confirms polymer-salt interactions. Interestingly, while peaks are seen at  $742\text{ cm}^{-1}$  for the neat EO-*co*-EPI characteristic of C-Cl stretching and at  $746\text{ cm}^{-1}$  for LiTFSI attributed to S-N-S stretching, the spectra of the LiTFSI-doped EO-*co*-EPI shows a shifted peak at  $740\text{ cm}^{-1}$ , suggesting interactions between the Cl atom of EO-*co*-EPI and LiTFSI.

**Polymer composites** (FigureS4): In analogy to the FTIR spectra of the LiTFSI-doped EO-*co*-EPI (FigureS3), for the CNF-reinforced, LiTFSI-doped EO-*co*-EPI (FigureS4) the S-N-S stretching band at  $1056\text{ cm}^{-1}$  and the (shifted) C-O-C stretching band at  $1090\text{ cm}^{-1}$  strongly confirm the successful incorporation of LiTFSI into the EO-*co*-EPI. The C-O-C stretching band appears at  $1092\text{ cm}^{-1}$  for the neat EO-*co*-EPI, slightly shifts up to  $1093\text{ cm}^{-1}$  for the CNF-reinforced EO-*co*-EPI (no LiTFSI), while it shifts down to  $1089\text{ cm}^{-1}$  for the LiTFSI-doped EO-*co*-EPI (no CNF). For the CNF-reinforced, LiTFSI-doped EO-*co*-EPI, the C-O-C stretching band is at  $1090\text{ cm}^{-1}$ , which appears to be a result of both LiTFSI and CNF addition, reflecting that the ether oxygen in C-O-C can complex  $\text{Li}^+$  of LiTFSI, but also hydrogen bond to OH in CNFs.

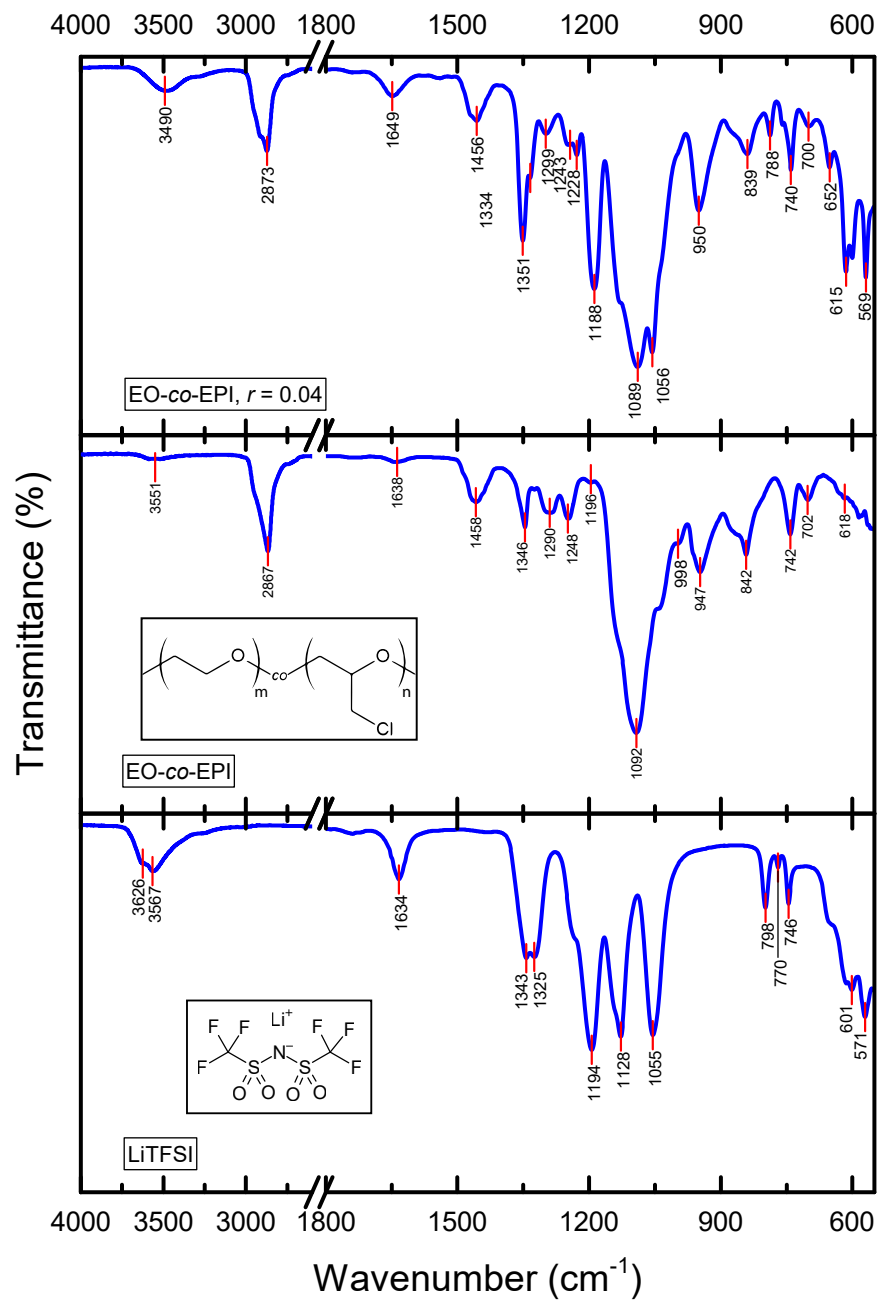

Figure S3: FTIR spectra of an EO-co-EPI electrolyte with an LiTFSI concentration of  $r = 0.04$  and without added CNFs (*top*), a neat EO-co-EPI copolymer without added LiTFSI and without CNFs (*middle*), and LiTFSI salt (*bottom*) with the chemical structures of EO-co-EPI and LiTFSI shown as insets.

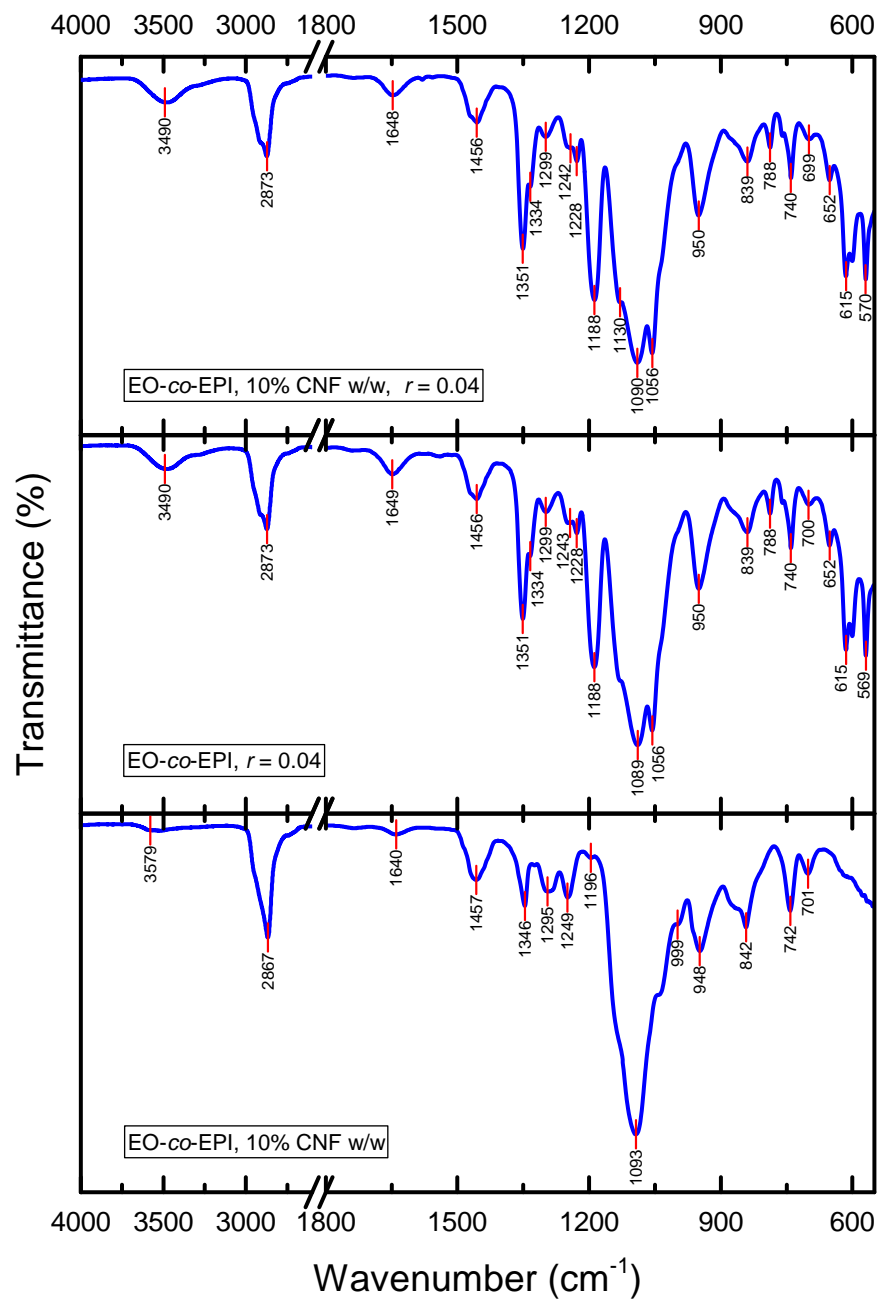

Figure S4: FTIR spectra of an EO-co-EPI composite electrolyte with 10% w/w CNFs and an LiTFSI concentration  $r = 0.04$  (top), an EO-co-EPI electrolyte without added CNFs and an LiTFSI concentration  $r = 0.04$  (middle), and an EO-co-EPI composite with 10% w/w CNFs and without added LiTFSI (bottom).

## Mechanical properties

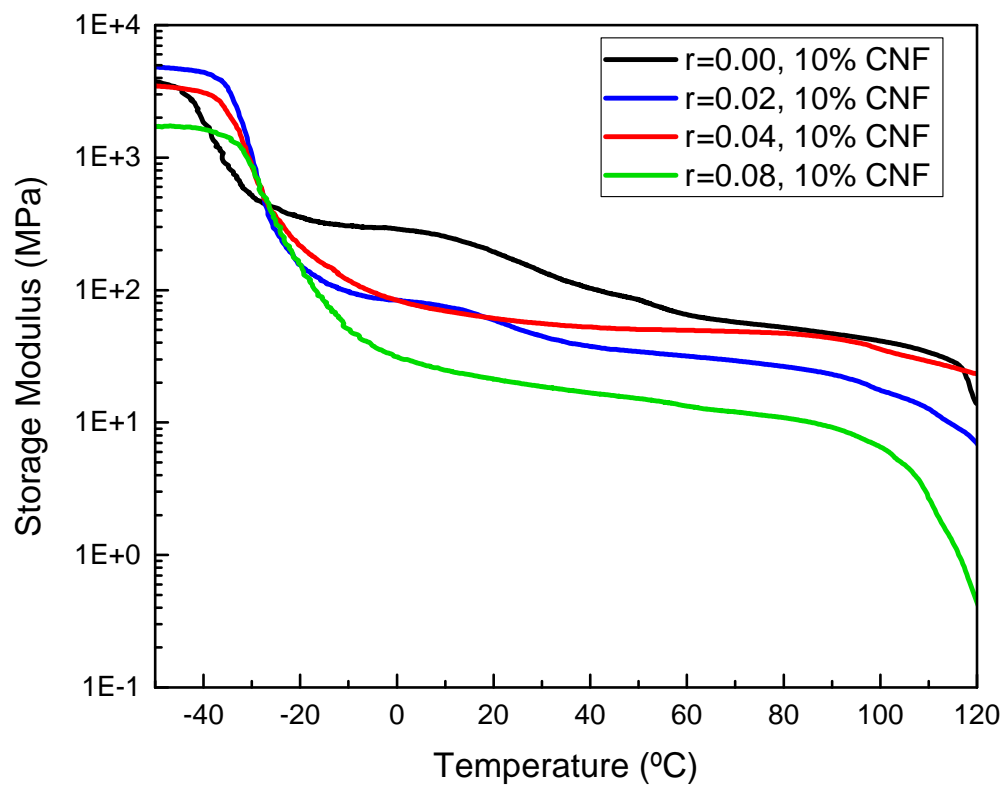

Figure S5: Storage modulus  $E'$  vs temperature of EO-co-EPI composite electrolytes with different LiTFSI salt concentrations ( $r = 0.02$ ,  $r = 0.04$ ,  $r = 0.08$ ) and 10% w/w CNFs.

## Thermal properties

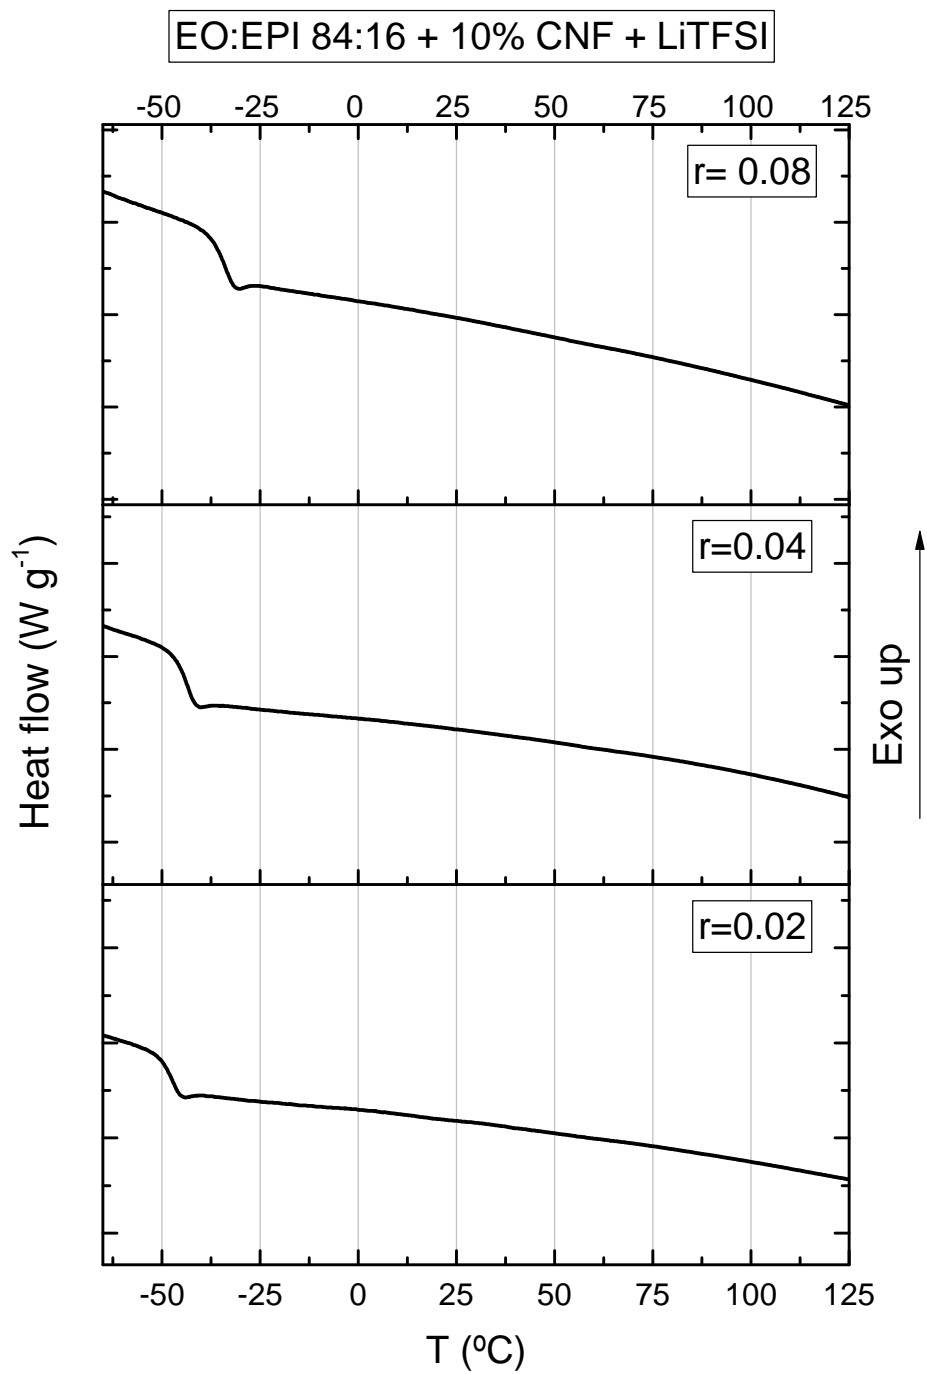

Figure S6: DSC curves of EO-co-EPI composite electrolytes with 10% w/w CNFs and different LiTFSI salt concentrations  $r$ .



## Characterisation of ionic conductivity

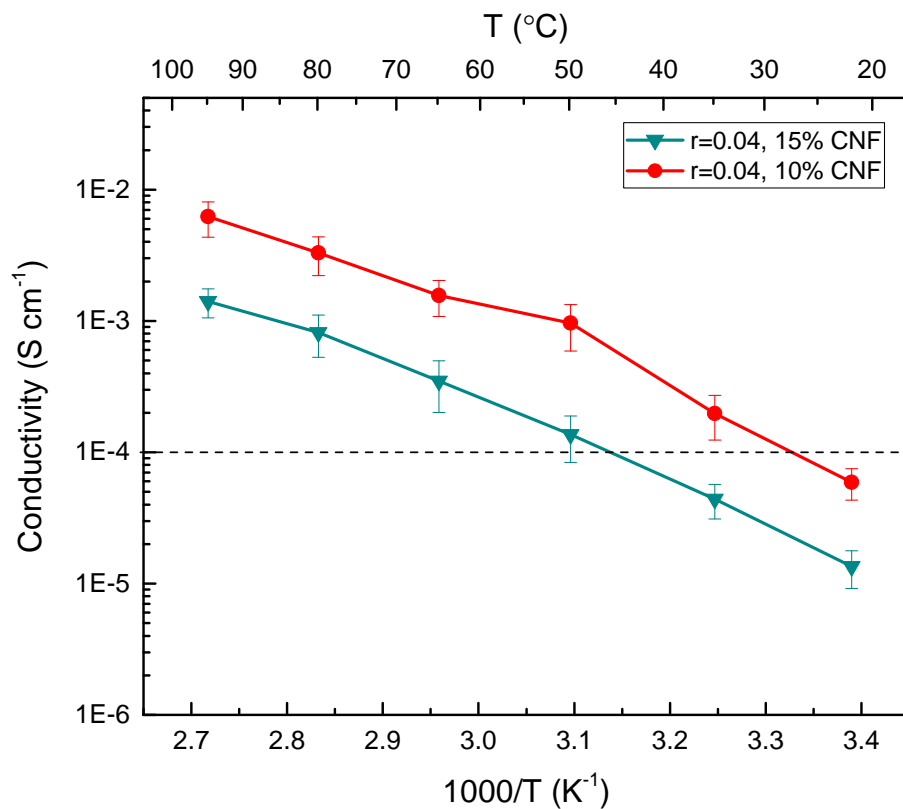

Figure S7: Comparison of the temperature-dependent ionic conductivities of the EO-co-EPI composite electrolytes reinforced with 10% w/w and 15% w/w CNFs and constant LiTFSI salt concentration of  $r = 0.04$ .

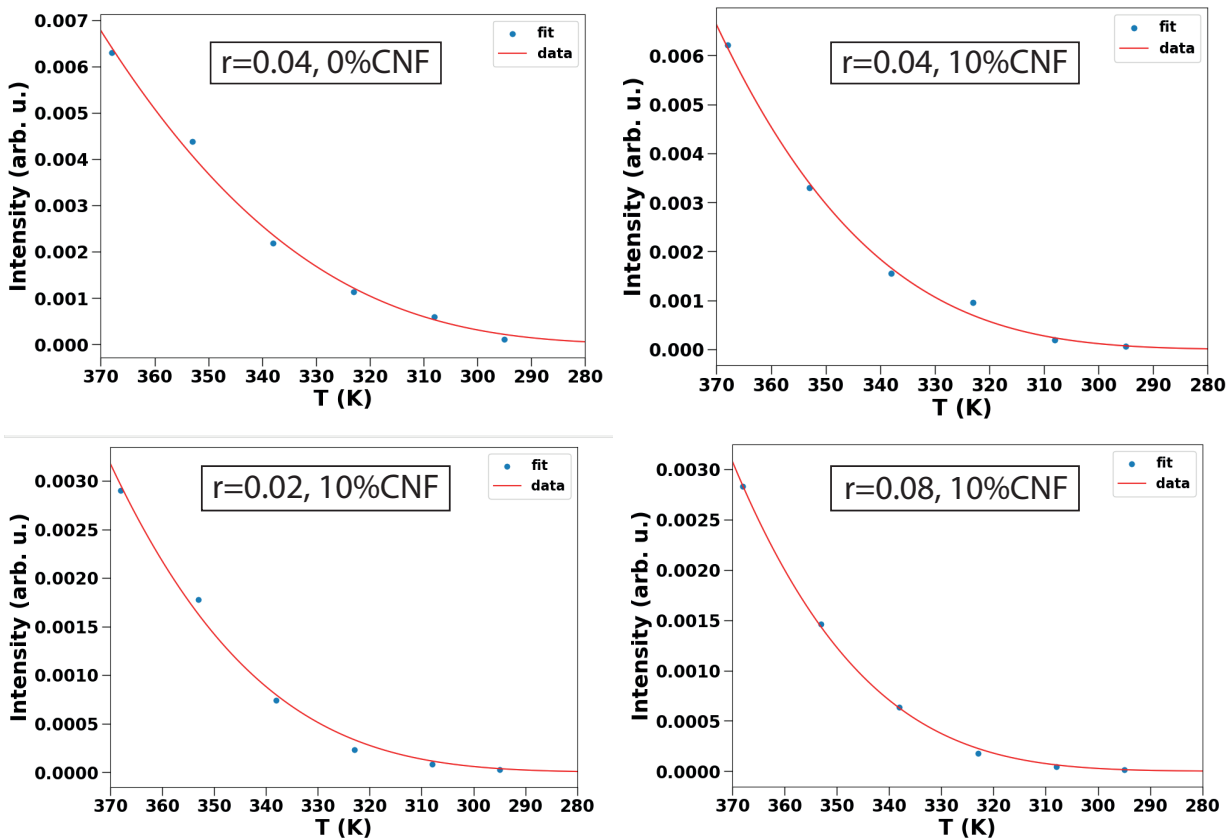

Figure S8: VTF fitting of the ionic conductivity of an LiTFSI-doped EO-co-EPI composite electrolyte without added CNFs as well as LiTFSI-doped EO-co-EPI composite electrolytes with 10% w/w CNFs and different salt concentrations  $r$ .

## Electrochemical characterisation

The CV curve of an EO-*co*-EPI electrolyte with an LiTFSI concentration of  $r = 0.04$  and without CNFs (Figure S9) agrees with previous work on similar systems.<sup>2,3</sup> For the cathodic sweep, the peak at -0.5 V is characteristic of the Li deposition in Cu, while for the anodic scan, the small peak slightly below 4 V is due to the oxidation of PEO.<sup>4,5</sup>

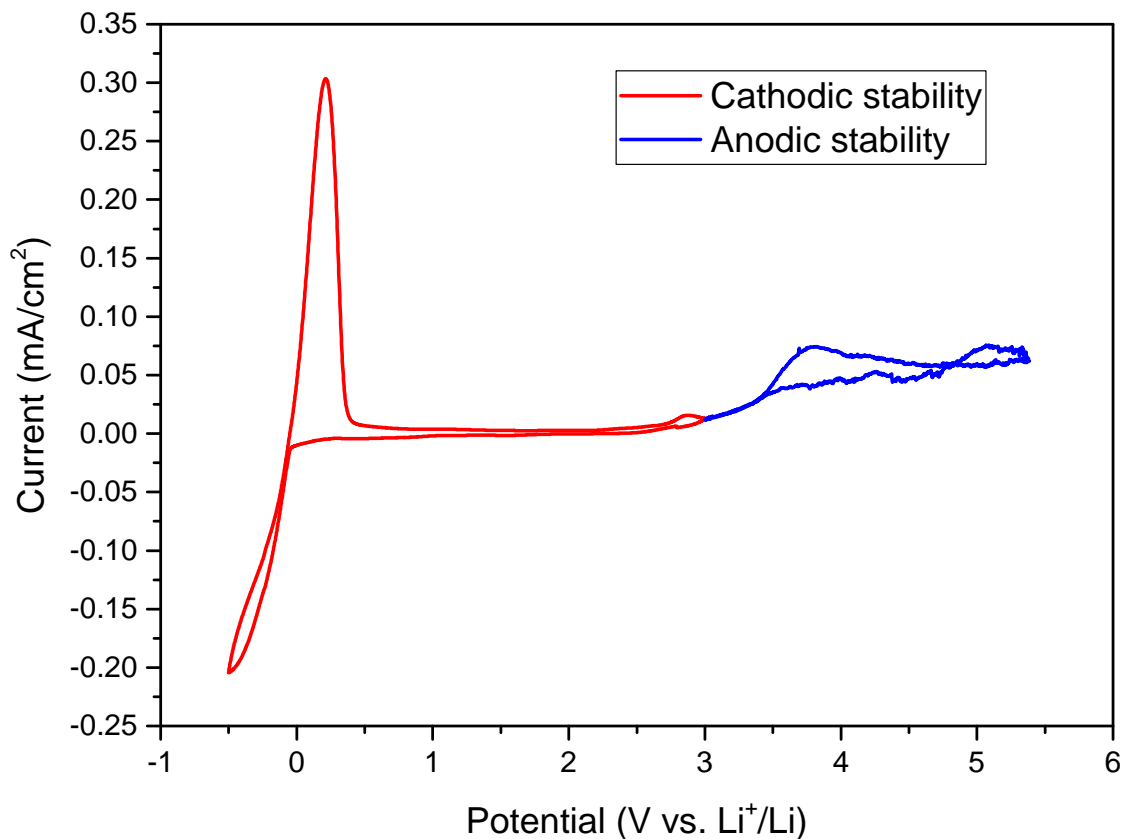

Figure S9: Cyclic voltammogram of an EO-*co*-EPI electrolyte with an LiTFSI concentration of  $r = 0.04$  and without CNFs over a potential range of  $-0.5 \text{ V} - 5.5 \text{ V}$ , at a scan rate of  $0.5 \text{ mV s}^{-1}$  and a temperature of  $70^\circ\text{C}$ .

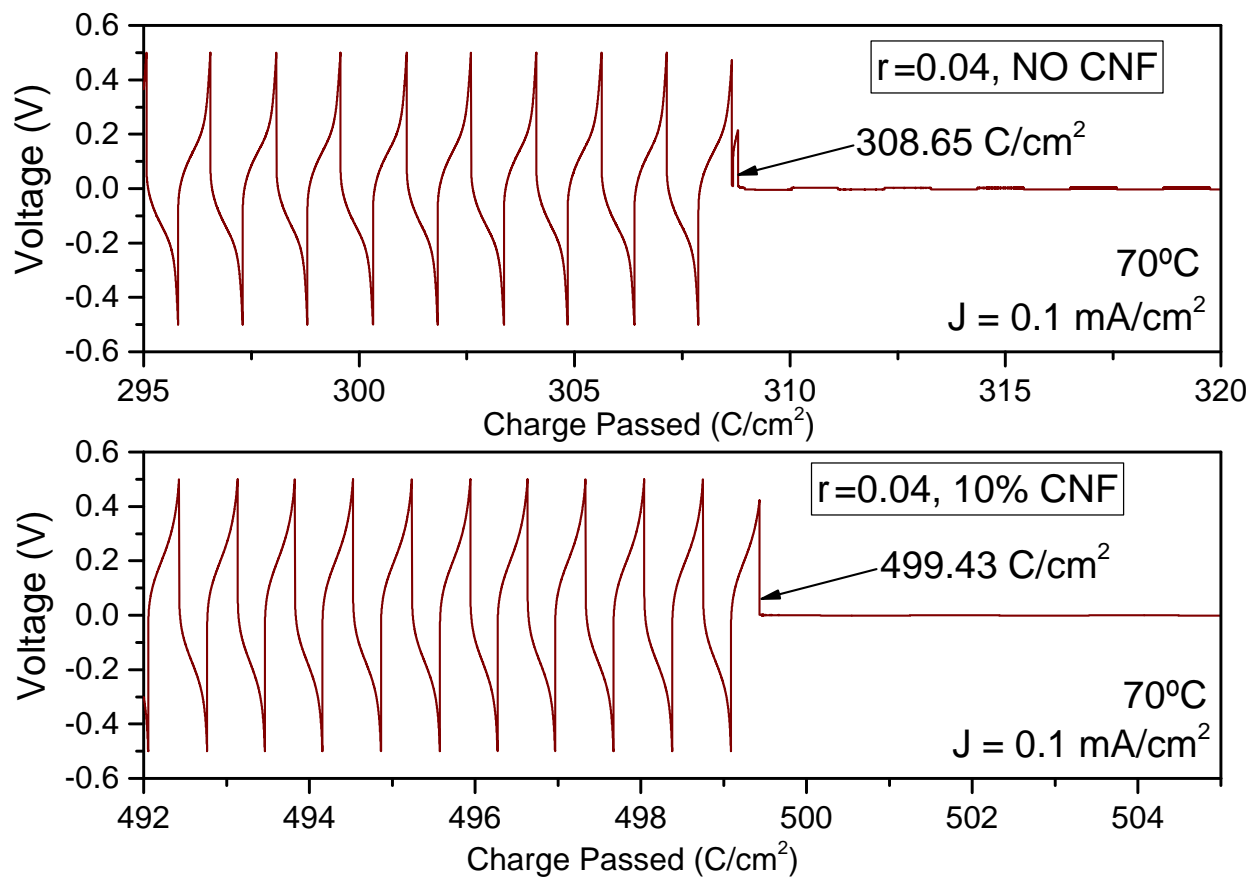

Figure S10: Plots of the voltage versus total charge passed for symmetrical Li/Li using LiTFSI-doped EO-co-EPI composite electrolytes with a salt concentration of  $r = 0.04$  a) without CNF reinforcement, and b) with 10% w/w CNFs. In both cases the last cycles before failure are shown.

## References

- (1) Rey, I.; Lassègues, J.; Grondin, J.; Servant, L. Infrared and Raman study of the PEO-LiTFSI polymer electrolyte. *Electrochimica Acta* **1998**, *43*, 1505–1510.
- (2) Gazotti, W.; Spinacé, M.; Girotto, E.; De Paoli, M.-A. Polymer electrolytes based on ethylene oxide–epichlorohydrin copolymers. *Solid State Ionics* **2000**, *130*, 281–291.
- (3) Goulart Silva, G.; Lemes, N. H.; Polo Da Fonseca, C. N.; De Paoli, M. A. Solid state polymeric electrolytes based on poly(epichlorohydrin). *Solid State Ionics* **1996**, *93*, 105–116.
- (4) Méry, A.; Rousselot, S.; Lepage, D.; Dollé, M. A Critical Review for an Accurate Electrochemical Stability Window Measurement of Solid Polymer and Composite Electrolytes. *Materials* *2021*, *Vol. 14*, *Page 3840* **2021**, *14*, 3840.
- (5) Xue, Z.; He, D.; Xie, X. Poly(ethylene oxide)-based electrolytes for lithium-ion batteries. *J. Mater. Chem. A* **2015**, *3*, 19218–19253.
